# Supplementary material
Source: publisher figshare collection journal article supplement (https://acs.figshare.com/ndownloader/files/4374271)
Supplement: Supplementary file 1 [file 4374271]

## **SUPPORTING INFORMATION**

### **Catalytic Decomposition of Toxic Chemicals Over Metal-Promoted**

#### **Carbon Nanotubes**

LILI LI <sup>a,c</sup>, CHANGXIU HAN <sup>b</sup>, XINYU HAN <sup>a</sup>, YIXIAO ZHOU <sup>a</sup>, LI YANG <sup>a</sup>,  
BAOGUI ZHANG <sup>a\*</sup>, and JIANLI HU <sup>d</sup>

a College of Environmental Science and Engineering, Nankai University, Tianjin,  
300071, China

b Institute of New Catalytic Materials Science, College of Chemistry, Nankai  
University, Tianjin, 300071, China

c Department of Life Science , Zhoukou Normal University , Zhoukou, 466000,  
China

d Black & Veatch Corporation, Overland Park, Kansas, 66221, USA

**\*Corresponding author: Baogui Zhang**

**College of Environmental Science and Engineering, Nankai University**

**Tianjin, 300071, China**

**Tel: +86-2223503592.**

**Fax: +86-2223508807.**

**E-mail: [lierli@mail.nankai.edu.cn](mailto:lierli@mail.nankai.edu.cn)**

## Table of Contents

|                                                                                                                         |    |
|-------------------------------------------------------------------------------------------------------------------------|----|
| Pretreatment of CNTS .....                                                                                              | S1 |
| FIGURE S1. TEM images of (a) Co/CNTs, (b) CoCeBP/CNTs.....                                                              | S2 |
| FIGURE S2. TEM images of spent catalysts tested at 300-460°C (a) CoCe/CNTs(b) CoCeB/CNTs.....                           | S2 |
| FIGURE S3. XPS spectra of spent catalysts in the energy levels of a: Co2p, b: P2p, c:Ce3d, d:B1s.....                   | S3 |
| FIGURE S4.....                                                                                                          | S4 |
| TABLE S1. Summary of XPS spectra parameters of spent Ce-promoted Co/CNTs.                                               | S4 |
| TABLE S2. Phosphorus yield obtained from PH <sub>3</sub> decomposition reaction over Ce-promoted Co/CNTs catalysts..... | S4 |

## **Supporting information including description of pretreatment of carbon nanotubes (CNTs); and 4 figures and 2 tables.**

### **Pretreatment of CNTs**

The chemical reagents used in the preparation of the catalysts were analytical grade and used as-received. The multi-walled CNTs prepared by the chemical vapor deposition process were purchased from Shenzhen Nanotech Co., Ltd., China. The CNTs were pretreated before the active components were impregnated. 10g purchased CNTs (BET surface area 175m<sup>2</sup>/g) were first immersed in 500 ml 1:1 mixture of 98.3 wt% H<sub>2</sub>SO<sub>4</sub> and 65 wt% HNO<sub>3</sub> and sonicated for 0.5 h, then the solution was refluxed for 6 h at 120°C under ambient pressure. After filtration and wash with deionized water, the oxidized CNTs were further sonicated for 0.5 h and refluxed for 2 h in 500ml 27wt% ammonia at 60°C under ambient pressure. After filtration, the CNTs were washed with deionized water and vacuum-dried at 60°C for 24h.

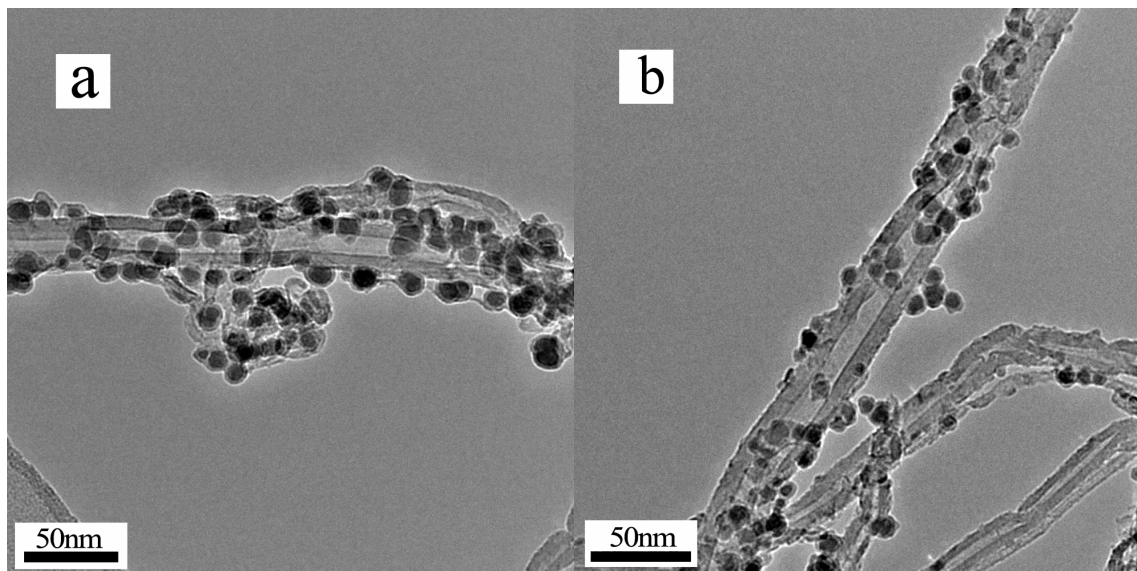

FIGURE S1. TEM images of (a) Co/CNTs, (b) CoCeBP/CNTs.

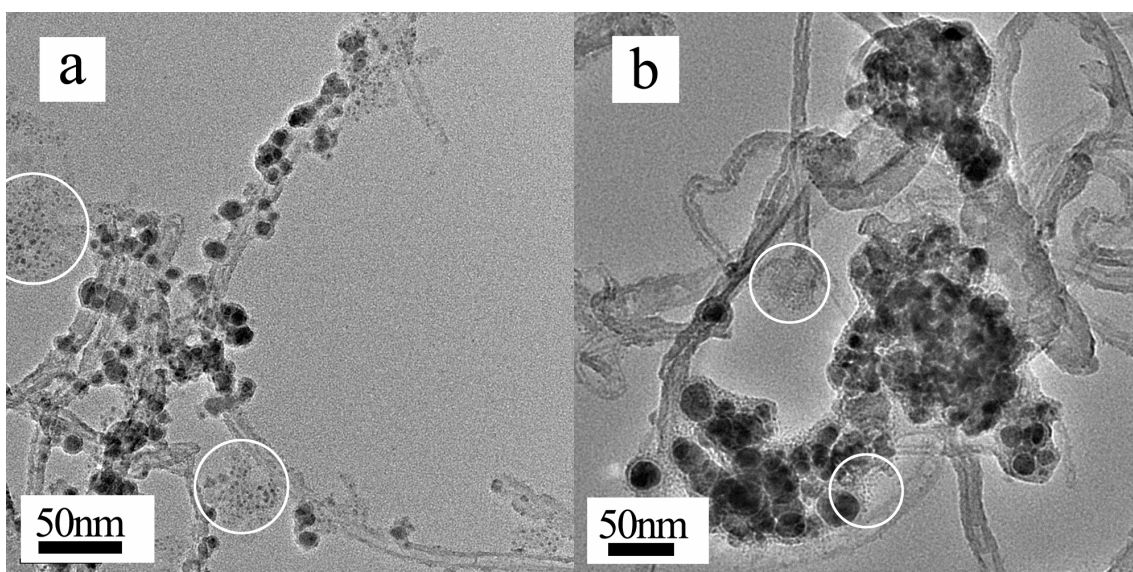

FIGURE S2. TEM images of spent catalysts tested at 300-460°C (a) CoCe/CNTs, (b) CoCeB/CNTs

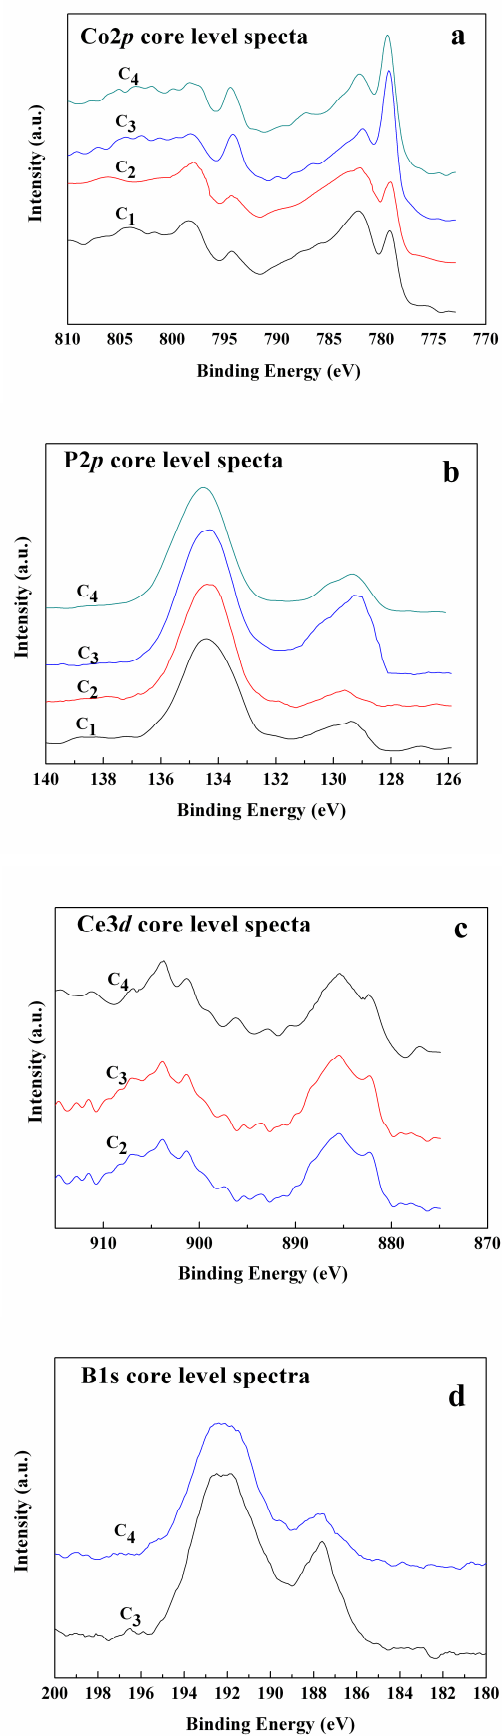

FIGURE S3. XPS spectra of spent catalysts in the energy levels of a: Co2p, b: P2p, c: Ce3d, d: B1s(C<sub>1</sub>: Co/CNTs, C<sub>2</sub>: CoCe/CNTs, C<sub>3</sub>: CoCeB/CNTs, C<sub>4</sub>: CoCeBP/CNTs).

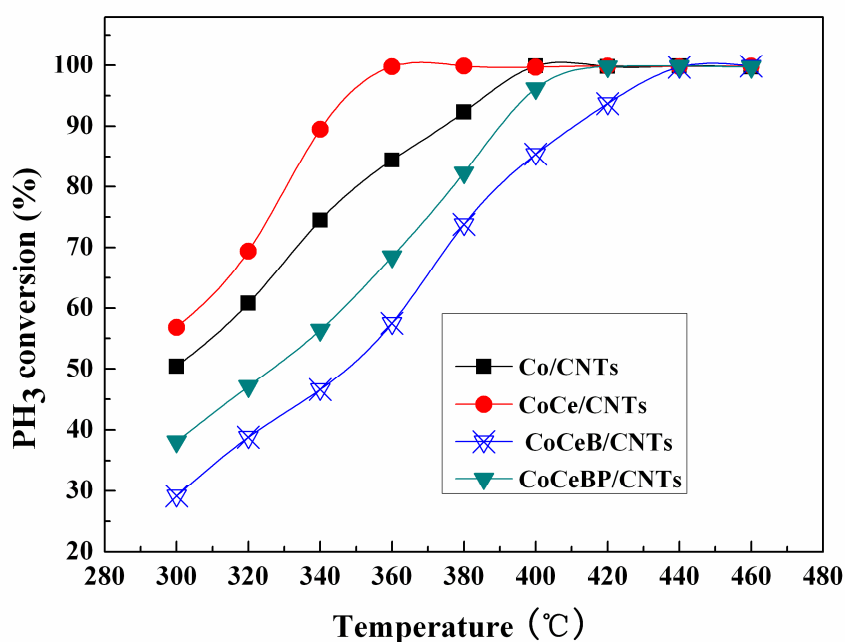

FIGURE S4. PH<sub>3</sub> decomposition under different temperatures( GHSV<sub>PH<sub>3</sub></sub> =2520ml/h.g<sub>cat</sub>)

TABLE S1. Summary of XPS Spectra Parameters of Spent Ce-promoted Co/CNTs

| catalyst    | binding energy (eV) |                      |                              |                     |                  |                      |       |       |
|-------------|---------------------|----------------------|------------------------------|---------------------|------------------|----------------------|-------|-------|
|             | Co <sup>2+</sup>    | Co 2p <sub>3/2</sub> | CoP                          | P 2p <sub>3/2</sub> | CeO <sub>2</sub> | Ce 3d <sub>5/2</sub> | B     | B 1s  |
| Co/CNTs     | 782.0               | 779.0                | PO <sub>4</sub> <sup>-</sup> | CoP                 | -                | -                    | -     | -     |
| CoCe/CNTs   | 781.6               | 778.9                | 134.4                        | 129.6               | 882.3            | 885.4                | -     | -     |
| CoCeB/CNTs  | 781.8               | 779.1                | 134.3                        | 129.3               | 882.3            | 885.3                | 187.5 | 192.4 |
| CoCeBP/CNTs | 781.9               | 779.2                | 134.5                        | 129.4               | 882.4            | 885.5                | 187.7 | 192.5 |

TABLE S2. Phosphorus Yield Obtained from PH<sub>3</sub> Decomposition Reaction over Ce-Promoted Co/CNTs Catalysts<sup>a</sup>

| catalyst    | P actually collected(g) | P theoretical (g) <sup>b</sup> | P yield (%) <sup>c</sup> |
|-------------|-------------------------|--------------------------------|--------------------------|
| Co/CNTs     | 21.1                    | 24.68                          | 85.53                    |
| CoCe/CNTs   | 26.55                   | 29.88                          | 88.86                    |
| CoCeB/CNTs  | 9.86                    | 12.47                          | 79.1                     |
| CoCeBP/CNTs | 15.71                   | 18.56                          | 84.6                     |

<sup>a</sup> GHSV<sub>PH<sub>3</sub></sub> =2520mL/h.g<sub>cat</sub>, T=360 °C, reaction time=32h, catalyst mass=300mg; <sup>b</sup>calculated from PH<sub>3</sub>

decomposition reaction: 2PH<sub>3</sub> → 2P + 3H<sub>2</sub>; <sup>c</sup>the yield equals (P actually collected/P theoretical) x 100%.
